# Supplementary material for: Silica-Based Aerogel Composites Reinforced with Reticulated Polyurethane Foams: Thermal and Mechanical Properties
Source: MDPI journal article supplement (doi:10.3390/gels8070392), 2022-06-21
Supplement: s1 [file s1]

## Article

# Silica-Based Aerogel Composites Reinforced with Reticulated Polyurethane Foams: Thermal and Mechanical Properties

Beatriz Merillas <sup>1,\*</sup>, Alyne Lamy-Mendes <sup>2</sup>, Fernando Villafañe <sup>3</sup>, Luisa Durães <sup>2</sup> and Miguel Ángel Rodríguez-Pérez <sup>1,4</sup>

<sup>1</sup> Cellular Materials Laboratory (CellMat), Condensed Matter Physics Department, Faculty of Science, University of Valladolid, Paseo de Belén 7, 47011 Valladolid, Spain; marrod@fmc.uva.es

<sup>2</sup> University of Coimbra, CIEPQPF, Department of Chemical Engineering, University of Coimbra, CIEPQPF, Rua Sílvio Lima, 3030-790 Coimbra, Portugal; alyne@eq.uc.pt (A.L.-M.); luisa@eq.uc.pt (L.D.)

<sup>3</sup> GIR MIOMeT-IU Cinquima-Química Inorgánica, Faculty of Science, University of Valladolid, Paseo de Belén 7, 47011 Valladolid, Spain; fernando.villafane@uva.es

<sup>4</sup> BioEcoUVA Research Institute on Bioeconomy, University of Valladolid, 47011 Valladolid, Spain

\* Correspondence: b.merillas@fmc.uva.es

## Supporting Information

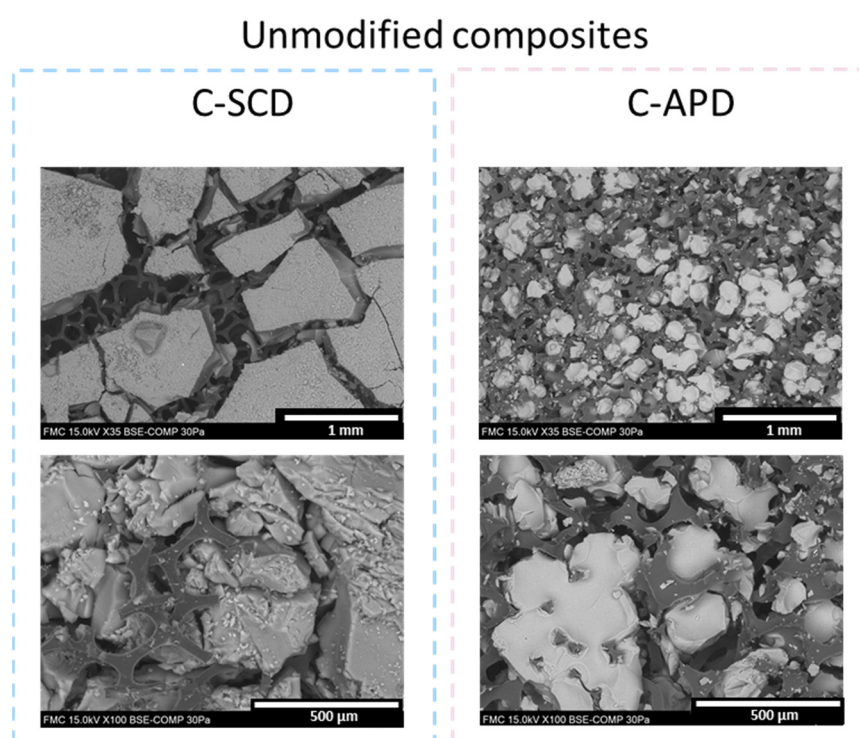

**Figure S1.** Scanning electron micrographs for the unmodified composites (C-SCD and C-APD).

**Table S1.** Elastic modulus for the produced samples.

| Sample    | Elastic modulus (kPa) |
|-----------|-----------------------|
| PU foam   | 21.87                 |
| C-SCD-M   | 202.98                |
| C-APD-M   | 181.34                |
| C-SCD     | 306.8                 |
| C-APD     | 451.03                |
| Sil-SCD-M | 130.00                |

**Table S2.** Absolute values of stress at 10 % of strain for all the samples measured at each compression-decompression cycle.

| $\sigma_{10\%}$           | FOAM | Si-SCD-M | C-SCD-M | C-APD-M | C-SCD | C-APD |
|---------------------------|------|----------|---------|---------|-------|-------|
| Cycle 1 (kPa)             | 3.96 | 10.25    | 15.81   | 12.49   | 22.62 | 20.50 |
| Cycle 2 (kPa)             | 3.88 | 10.20    | 15.67   | 12.11   | 21.84 | 20.03 |
| Cycle 3 (kPa)             | 3.83 | 10.18    | 15.62   | 11.90   | 21.42 | 19.80 |
| Cycle 4 (kPa)             | 3.79 | 10.15    | 15.54   | 11.75   | 21.16 | 19.62 |
| Cycle 5 (kPa)             | 3.77 | 10.14    | 15.51   | 11.68   | 20.95 | 19.42 |
| $[(C1-C5)/C1] \times 100$ | 4.70 | 1.01     | 1.88    | 6.51    | 7.35  | 5.25  |

**Table S3.** Relative values of stress at 10 % of strain for all the samples measured at each compression-decompression cycle.

| $\sigma_{10\%} / \rho$           | FOAM  | Si-SCD-M | C-SCD-M | C-APD-M | C-SCD | C-APD |
|----------------------------------|-------|----------|---------|---------|-------|-------|
| Cycle 1 (kPa·m <sup>3</sup> /kg) | 0.135 | 0.129    | 0.176   | 0.060   | 0.241 | 0.084 |
| Cycle 2 (kPa·m <sup>3</sup> /kg) | 0.132 | 0.129    | 0.175   | 0.058   | 0.233 | 0.082 |
| Cycle 3 (kPa·m <sup>3</sup> /kg) | 0.130 | 0.129    | 0.174   | 0.057   | 0.228 | 0.081 |
| Cycle 4 (kPa·m <sup>3</sup> /kg) | 0.129 | 0.128    | 0.173   | 0.056   | 0.226 | 0.080 |
| Cycle 5 (kPa·m <sup>3</sup> /kg) | 0.128 | 0.128    | 0.173   | 0.056   | 0.223 | 0.079 |
| $[(C1-C5)/C1] \times 100$        | 4.698 | 1.005    | 1.879   | 6.508   | 7.353 | 5.245 |
